## A Novel Bile Acid-Activated Vitamin D Receptor Signaling in Human Hepatocytes

Shuxin Han, Tiangang Li, Ewa Ellis, Stephen Strom, and John Y. L. Chiang

Department of Integrative Medical Sciences (S.H., T.L., J.Y.L.C.), Northeastern Ohio University's Colleges of Medicine and Pharmacy, Rootstown, Ohio 44272; and Department of Pathology (E.E., S.S.), University of Pittsburgh Medical Center, Pittsburgh, Pennsylvania 15213

Vitamin D receptor (VDR) is activated by natural ligands,  $1\alpha, 25$ -dihydroxy-vitamin  $D_3$  [ $1\alpha, 25(OH)_2-D_3$ ] and lithocholic acid (LCA). Our previous study shows that VDR is expressed in human hepatocytes, and VDR ligands inhibit bile acid synthesis and transcription of the gene encoding cholesterol  $7\alpha$ -hydroxylase (CYP7A1). Primary human hepatocytes were used to study LCA and  $1\alpha, 25(OH)_2-D_3$  activation of VDR signaling. Confocal immunofluorescent microscopy imaging and immunoblot analysis showed that LCA and  $1\alpha, 25(OH)_2-D_3$  induced intracellular translocation of VDR from the cytosol to the nucleus and also plasma membrane where VDR colocalized with caveolin-1. VDR ligands induced tyrosine phosphorylation of c-Src and VDR and their interaction. Inhibition of c-Src abrogated VDR ligand-dependent inhibition of CYP7A1 mRNA expression. Kinase assays showed that VDR ligands specifically activated the c-Raf/MEK1/2/extracellular signal-regulated kinase (ERK) 1/2 pathway, which stimulates serine phosphorylation of VDR and hepatocyte nuclear factor- $4\alpha$ , and their interaction. Mammalian two-hybrid assays showed a VDR ligand-dependent interaction of nuclear receptor corepressor-1 and silencing mediator of retinoid and thyroid with VDR/retinoid X receptor- $\alpha$  (RXR $\alpha$ ). Chromatin immunoprecipitation assays revealed that an ERK1/2 inhibitor reversed VDR ligand-induced recruitment of VDR, RXR $\alpha$ , and corepressors to human CYP7A1 promoter. In conclusion, VDR ligands activate membrane VDR signaling to activate the MEK1/2/ERK1/2 pathway, which stimulates nuclear VDR/RXR $\alpha$  recruitment of corepressors to inhibit CYP7A1 gene transcription in human hepatocytes. This membrane VDR-signaling pathway may be activated by bile acids to inhibit bile acid synthesis as a rapid response to protect hepatocytes from cholestatic liver injury. (*Molecular Endocrinology* 24: 1151–1164, 2010)

**B**ile acids are physiological agents that are essential for the digestion and absorption of fats and nutrients in the digestive system and disposal of drug and metabolites. Bile acids also are versatile signaling molecules that activate nuclear receptors and cellular signaling pathways and play critical roles in lipid, glucose, drug, and energy metabolism (1–4). Bile acid synthesis is under the negative feedback regulation by bile acids returning to the liver to inhibit the gene encoding cholesterol  $7\alpha$ -hydroxylase (CYP7A1), the initial and rate-limiting enzyme in the classic bile acid biosynthetic pathway to synthesize two primary bile acids, cholic acid (CA) and chenodeoxycholic

acid (CDCA) in human livers (1). Bile acids are known to activate a nuclear receptor, farnesoid X receptor (FXR, NR1H4), which plays a critical role in the regulation of bile acid synthesis and transport and glucose and lipoprotein metabolism (3). In the liver FXR induces a negative nuclear receptor, small heterodimer partner (NR0B2) to inhibit CYP7A1 gene transcription. In the intestine, FXR induces a fibroblast growth factor 15 (FGF15, or human

Abbreviations: BAREs, Bile acid response elements; CA, cholic acid; CDCA, chenodeoxycholic acid; co-IP, coimmunoprecipitation; CYP7A1, cholesterol  $7\alpha$ -hydroxylase; CYP24A1, sterol 24-hydroxylase; CYP27B1, sterol  $1\alpha$ -hydroxylase; CYP27A1, sterol 27-hydroxylase; ERK, extracellular signal-regulated kinase; FXR, farnesoid X receptor; HEK, human embryonic kidney; HNF, hepatocyte nuclear factor; IP, immunoprecipitation; LCA, lithocholic acid; MEK, MAPK/ERK kinase; NCoR-1, nuclear receptor corepressor-1; OA, okadaic acid;  $1\alpha, 25(OH)_2-D_3$ ,  $1\alpha, 25$ -dihydroxyvitamin  $D_3$ ; PGC, peroxisomal proliferator-activated receptor- $\gamma$  coactivator; PI3K, phosphoinositol-3 kinase; PKA, protein kinase A; PKC, protein kinase C; Q-PCR, real-time quantitative PCR; RXR $\alpha$ , retinoid X receptor  $\alpha$ ; SMRT, silencing mediator of retinoid and thyroid; SRC-1, steroid receptor coactivator-1; TK, thymidine kinase; UAS, upstream activating sequence; VDR, vitamin D receptor; VDRE, VDR response element.

ISSN Print 0888-8809 ISSN Online 1944-9917

Printed in U.S.A.

Copyright © 2010 by The Endocrine Society

doi: 10.1210/me.2009-0482 Received November 19, 2009. Accepted March 3, 2010.

First Published Online April 6, 2010

FGF19), which activates the hepatic FGF receptor 4 signaling pathway to inhibit CYP7A1 and bile acid synthesis (5, 6). Lithocholic acid (LCA), a highly hydrophobic and toxic bile acid derived from CDCA by intestinal bacteria action, is an efficacious endogenous ligand of vitamin D receptor (VDR, NR1H1) (7) and pregnane X receptor (NR1H2) (8). These two xenobiotic sensors induce drug-metabolizing cytochrome P450 3A4 (CYP3A4) and sulfotransferase 2A1 and may play a role in detoxification of drugs and bile acids in the liver and intestine (9, 10).

VDR is widely expressed in most tissues and cells (11). However, it has been reported that VDR is not expressed in mouse livers (12). In rat liver, VDR is expressed mainly in the nonparenchymal and biliary epithelial cells (13). Recently, we reported that VDR protein and mRNA were expressed in HepG2 and human primary hepatocytes (14). LCA and  $1\alpha,25\text{-dihydroxyvitamin D}_3$  [ $1\alpha,25(\text{OH})_2\text{-D}_3$ ] increased VDR protein expression in the nucleus of hepatocytes and strongly inhibited CYP7A1 mRNA expression and bile acid synthesis in primary human hepatocytes. Furthermore, small interfering RNA knockdown of VDR mRNA blocked the inhibitory effect of VDR ligands on CYP7A1 mRNA expression in human hepatocytes. The VDR and retinoid X receptor  $\alpha$  (RXR $\alpha$ ) heterodimer binds to the bile acid response elements (BAREs) to block hepatocyte nuclear factor 4 $\alpha$  (HNF4 $\alpha$ ) binding and reduce coactivator occupancy but increases corepressor recruitment to CYP7A1 promoter and results in inhibiting CYP7A1 gene transcription (14).

The active hormone  $1\alpha,25(\text{OH})_2\text{-D}_3$  regulates various physiological functions including calcium and phosphate homeostasis, cell growth and differentiation, and gene transcription in many tissues (11). Upon binding and activation by  $1\alpha,25(\text{OH})_2\text{-D}_3$ , the VDR/RXR $\alpha$  heterodimer binds to the positive or negative VDR response elements to regulate target gene transcription. The positive regulation of VDR target genes by VDR signaling has been studied extensively. However, the mechanism underlying the negative effect of VDR on gene transcription remains unclear. Furthermore, more recent studies have unveiled the potential nongenomic action of  $1\alpha,25(\text{OH})_2\text{-D}_3$  in tissues and cells expressing VDR (15). It appears that the rapid response action of  $1\alpha,25(\text{OH})_2\text{-D}_3$  is mediated through the membrane-bound VDR, which is present in the caveolae-enriched plasma membrane (16). It has been reported that  $1\alpha,25(\text{OH})_2\text{-D}_3$  stimulates tyrosine phosphorylation of VDR and a cytosolic tyrosine kinase, c-Src, in muscle cells (17, 18). This VDR-dependent signaling activates several kinases including cAMP-dependent pro-

tein kinase A (PKA), phosphoinositol-3 kinase (PI3K), protein kinase C (PKC), and MAPKs in muscle, keratinocytes, osteoblasts, and kidney (16, 19). The presence of VDR in plasma membrane of hepatocytes has not been reported, and the VDR signaling pathway has not been elucidated in human hepatocytes.

We have studied  $1\alpha,25(\text{OH})_2\text{-D}_3$  and LCA-activated intracellular signaling in primary human hepatocytes, the best model for studying bile acid synthesis and human CYP7A1 gene regulation. Our results show that  $1\alpha,25(\text{OH})_2\text{-D}_3$  and LCA induce intracellular translocation of VDR to both the plasma membrane and nucleus of human hepatocytes. Membrane VDR signaling stimulates tyrosine phosphorylation of VDR and induces VDR interaction with c-Src. The membrane VDR signaling specifically activates the c-Raf/mitogen-activated extracellular kinase 1/2 (MEK1/2)/MAKP/ERK kinase (ERK)1/2 pathway. In the nucleus, VDR signaling stimulates phosphorylation of VDR, RXR $\alpha$ , and HNF4 $\alpha$  and induces VDR/RXR $\alpha$  heterodimer recruitment of corepressors to inhibit CYP7A1 gene transcription. This membrane VDR signaling pathway may be a rapid response to cholestasis to protect the liver from cholestatic injury.

## Results

### VDR ligands induce intracellular translocation of VDR to the plasma membrane and nucleus in human hepatocytes

Our previous study has shown that  $1\alpha,25(\text{OH})_2\text{-D}_3$  increases VDR in nuclear extracts isolated from human hepatocytes (14). To study whether ligands induce VDR nuclear translocation or increase VDR expression, immunoblot assays were used to detect VDR protein in total cellular protein extracts, cytosol, nuclear and membrane fractions isolated from primary human hepatocytes pretreated with an endogenous VDR ligand,  $1\alpha,25(\text{OH})_2\text{-D}_3$  (50 nM), or LCA (10  $\mu\text{M}$ ). We also treated hepatocytes with LCA-acetate (10  $\mu\text{M}$ ), which is a nontoxic, highly efficacious and selective VDR agonist (20). We also treated hepatocytes with CDCA (20  $\mu\text{M}$ ) or cholic acid (CA, 20  $\mu\text{M}$ ). These two bile acids are endogenous ligands of FXR but not VDR. Figure 1 shows that none of these reagents had effects on VDR protein expression levels in total cell extracts. However,  $1\alpha,25(\text{OH})_2\text{-D}_3$ , LCA, and LCA-acetate markedly decreased VDR protein in the cytosol but increased VDR in the nuclear and plasma membranes (Fig. 1). Interestingly,  $1\alpha,25(\text{OH})_2\text{-D}_3$ , LCA, or LCA-acetate increased membrane caveolin-1 levels, which parallels the increase of VDR levels in the

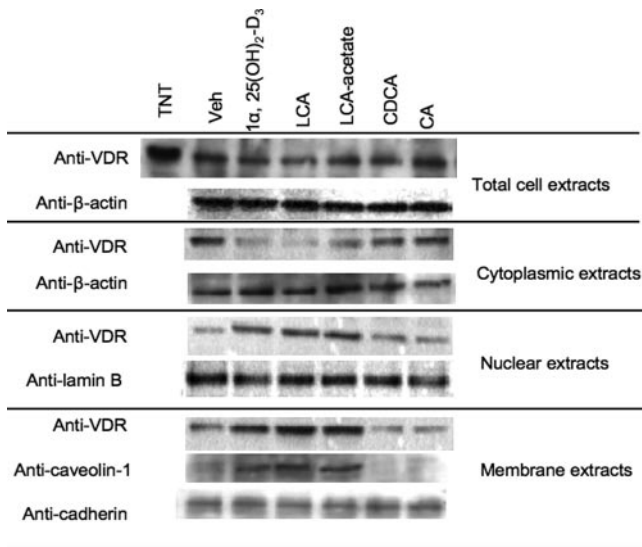

**FIG. 1.** Immunoblot analysis of VDR expression in primary human hepatocytes. Human primary hepatocytes were treated with vehicle (Veh, EtOH),  $1\alpha,25(\text{OH})_2\text{-D}_3$  (50 nM), LCA (10  $\mu\text{M}$ ), LCA-acetate (10  $\mu\text{M}$ ), CDCA (20  $\mu\text{M}$ ), or CA (20  $\mu\text{M}$ ) for 6 h. Cytoplasmic, nuclear, and membrane fractions (40  $\mu\text{g}$ ) were isolated from human primary hepatocytes for immunoblot analysis. A rabbit antihuman VDR antibody was used to detect VDR.  $\beta$ -Actin and Lamin B were monitored as the internal loading controls of cytosol and nucleus, respectively. Caveolin-1 was monitored as a marker of caveolae membrane subdomain. Anti-pan-cadherin was used to assay cadherin as a marker of plasma membrane protein. Data represent one of three separate experiments using primary human hepatocytes isolated from different liver donors (HH1472, HH1483, and HH1493).

membrane fractions. Caveolin-1 is a marker of caveolae, a membrane subdomain enriched with cholesterol, sphingolipids, and membrane receptors involved in cell signaling. CDCA and CA are weak VDR ligands and had little effect on intracellular localization of VDR.

To further study the effect of  $1\alpha,25(\text{OH})_2\text{-D}_3$ , LCA, or LCA-acetate on intracellular translocation of VDR, we used confocal immunofluorescent microscopy imaging to assay intracellular translocation of VDR in primary human hepatocytes. Figure 2 shows that without adding a ligand, VDR (stained with Fluor Alexa and scanned at 488 nm, shown in *green*) is predominantly located in the cytosol (*top row*). Caveolin-1 (stained with Fluor Alexa and scanned at 546 nm, shown in *orange-red*) is localized in the plasma membrane and in the perinucleus surface (*purple*). Cell nuclei were stained with TO-PRO-3 (*blue*). Merging of three images confirmed predominant localization of unliganded VDR in the cytosol. After treatment with  $1\alpha,25(\text{OH})_2\text{-D}_3$ , LCA, or LCA-acetate, VDR and caveolin-1 were predominantly localized in the plasma membrane and some were colocalized in the same region (*yellow*). VDR was also translocated into the nucleus (*aqua*), and some VDR and caveolin-1 were colocalized in the perinucleus surface (*purple*). In con-

trast, CA treatment caused translocation of some VDR to the nuclei, but clearly not to the membrane. These results revealed a ligand-induced intracellular translocation of VDR from the cytosol to both the nucleus and plasma membrane, and that caveolin-1 and VDR may be translocated together to the caveolae in the plasma membrane. These confocal fluorescent imaging data are consistent with the data from immunoblot analysis shown in Fig. 1.

### LCA-acetate and $1\alpha,25(\text{OH})_2\text{-D}_3$ activate tyrosine phosphorylation of c-Src and membrane VDR

It has been reported that  $1\alpha,25(\text{OH})_2\text{-D}_3$  stimulated tyrosine phosphorylation of VDR and activated c-Src in skeletal muscle cells, and the tyrosine-phosphorylated VDR forms a complex with c-Src (21, 22). Human c-Src has two major phosphorylation sites. Phosphorylation of tyrosine-419 (Y419 in human or Y416 in chicken c-Src) and dephosphorylation of tyrosine 530 (Y530 in human or Y527 in chicken c-Src) activates c-Src. To study the effect of VDR ligands on tyrosine phosphorylation of VDR and c-Src in human hepatocytes, we used an anti-VDR antibody to precipitate VDR from membrane fractions and used antiphosphotyrosine antibody (anti-p-tyrosine) to detect tyrosine-phosphorylated VDR. Figure 3A shows that  $1\alpha,25(\text{OH})_2\text{-D}_3$ , LCA, and LCA-acetate, but not CDCA and CA, markedly increased the amount of tyrosine-phosphorylated VDR in plasma membrane. To test whether c-Src is associated with VDR in the plasma membrane, we used anti-c-Src antibodies to detect c-Src that might be coimmunoprecipitated with VDR. Figure 3B shows that anti-c-Src and anti-phospho-Y416 antibodies detected c-Src and tyrosine-phosphorylated c-Src coimmunoprecipitated with VDR in the plasma membrane fractions isolated from LCA-acetate or  $1\alpha,25(\text{OH})_2\text{-D}_3$  treated human hepatocytes. To further confirm that  $1\alpha,25(\text{OH})_2\text{-D}_3$  signaling involves c-Src, we treated primary human hepatocytes with a specific c-Src inhibitor, AZD0530, and performed immunoprecipitation assay. Figure 3C shows that AZD0530 significantly decreased the amount of tyrosine-phosphorylated VDR in the immunoprecipitants isolated from cells treated with  $1\alpha,25(\text{OH})_2\text{-D}_3$  or LCA-acetate. These coimmunoprecipitation (co-IP) assays suggest that  $1\alpha,25(\text{OH})_2\text{-D}_3$  signaling stimulates tyrosine phosphorylation of VDR and translocation of VDR and c-Src to the plasma membrane. To test the role of c-Src in regulation of CYP7A1 by membrane VDR signaling, we used quantitative RT-PCR assay to study the effect of AZD0530 on CYP7A1 mRNA expression levels in primary human hepatocytes. Figure 3D (*left panel*) shows that AZD0530 treatment alone increased CYP7A1 mRNA expression levels by 2-fold

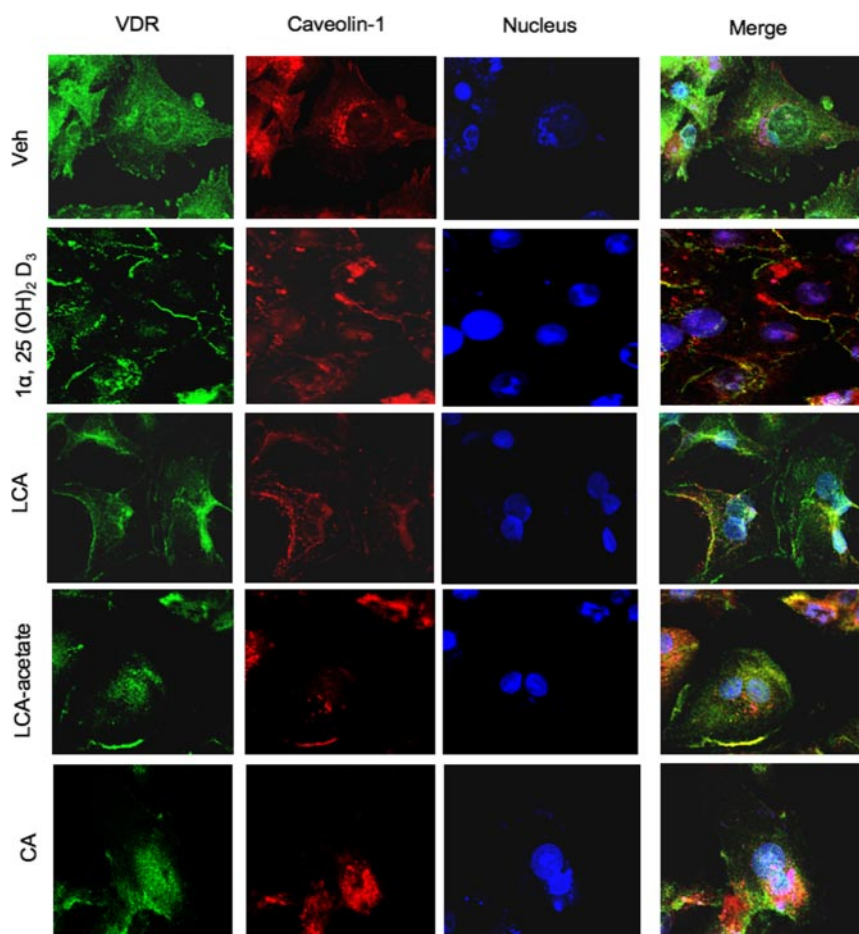

**FIG. 2.** Confocal immunofluorescent microscopy analysis of effect of VDR ligands on the intracellular localization of VDR in primary human hepatocytes. Caveolin-1 antibody and the secondary antibody conjugated with red fluorescence were used to detect caveolin-1. VDR antibody and the secondary antibody conjugated with green fluorescence were used to detect VDR. Cell nuclei were stained by TOPRO-3 iodide 642/661 nm. The merges of three images are shown in the *right column*. The cells were treated with vehicle (Veh, EtOH), 50 nM  $1\alpha,25(\text{OH})_2\text{-D}_3$ , 10  $\mu\text{M}$  LCA, 10  $\mu\text{M}$  LCA-acetate, or 25  $\mu\text{M}$  CA for 6 h as indicated.

indicating that c-Src was constitutively active in inhibiting basal level expression of CYP7A1 in hepatocytes. AZD0530 completely blocked inhibition of CYP7A1 mRNA expression in primary human hepatocytes by  $1\alpha,25(\text{OH})_2\text{-D}_3$  or LCA-acetate. To further confirm the involvement of c-Src in VDR signaling in hepatocytes, we studied the effect of AZD0530 on the expression of a well-characterized VDR-induced gene CYP24A1, which inactivates  $1\alpha,25(\text{OH})_2\text{-D}_3$  by 24-hydroxylation (23). Figure 3D (*right panel*) shows that  $1\alpha,25(\text{OH})_2\text{-D}_3$  and LCA-acetate strongly induced CYP24A1 mRNA expression in human primary hepatocytes, and AZD0530 strongly abrogated the induction of CYP24A1 mRNA by  $1\alpha,25(\text{OH})_2\text{-D}_3$  or LCA-acetate. As a negative control these VDR ligands had no effect on mRNA expression of sterol 27-hydroxylase (CYP27A1), which is involved in bile acid synthesis in hepatocytes (data not shown). These results support that c-Src is involved in membrane VDR

signaling in regulation of CYP7A1 and CYP24A1 gene expression in human hepatocytes.

### ERK1/2 inhibitors attenuate LCA-acetate and $1\alpha,25(\text{OH})_2\text{-D}_3$ inhibition of human CYP7A1 in human hepatocytes

We have reported previously that LCA-acetate and  $1\alpha,25(\text{OH})_2\text{-D}_3$  inhibited CYP7A1 gene transcription in human hepatocytes (14). It has been reported that the  $1\alpha,25(\text{OH})_2\text{-D}_3$  signaling rapidly activates PKC, PKA, PI-3-Kinase, AKT, and MAPK pathways in several tissues including bone, intestine, muscle, epidermal, and cancer cells (16, 19). To study  $1\alpha,25(\text{OH})_2\text{-D}_3$  signaling in the liver and to identify which kinase(s) is/are involved in mediating  $1\alpha,25(\text{OH})_2\text{-D}_3$  signaling in regulation of the CYP7A1 gene in human hepatocytes, several protein kinase inhibitors were used to investigate their effects on down-regulation of CYP7A1 mRNA expression levels by LCA-acetate or  $1\alpha,25(\text{OH})_2\text{-D}_3$  in human hepatocytes. Figure 4A shows that among all inhibitors tested, only PD98059 (ERK1/2 inhibitor) and U0126 (MEK1/2 inhibitor), attenuated the inhibitory effect of LCA-acetate or  $1\alpha,25(\text{OH})_2\text{-D}_3$  on human CYP7A1 mRNA expression in primary human hepatocytes. Transient transfection assays of a human CYP7A1

promoter/luciferase reporter were used to study the effect of VDR ligands and kinase inhibitors on the reporter activity. Figure 4B shows that pretreatment with PD98059 and U0126, but not other inhibitors, weakened the inhibitory effects of LCA-acetate and  $1\alpha,25(\text{OH})_2\text{-D}_3$  on human CYP7A1 reporter activities. As a negative control, none of these inhibitors and VDR ligands had any effects on human CYP27A1 reporter activity (data not shown). These results suggest that ligand-activated VDR specifically activates the MEK1/2/ERK1/2 pathway to inhibit CYP7A1 transcription in human hepatocytes.

### VDR ligands activate c-Raf, MEK, and ERK1/2 in human hepatocytes

We then used immunoblot analysis to study the effect of  $1\alpha,25(\text{OH})_2\text{-D}_3$  and LCA-acetate on c-Raf, MEK1/2, and ERK1/2 phosphorylation in primary human hepatocytes.

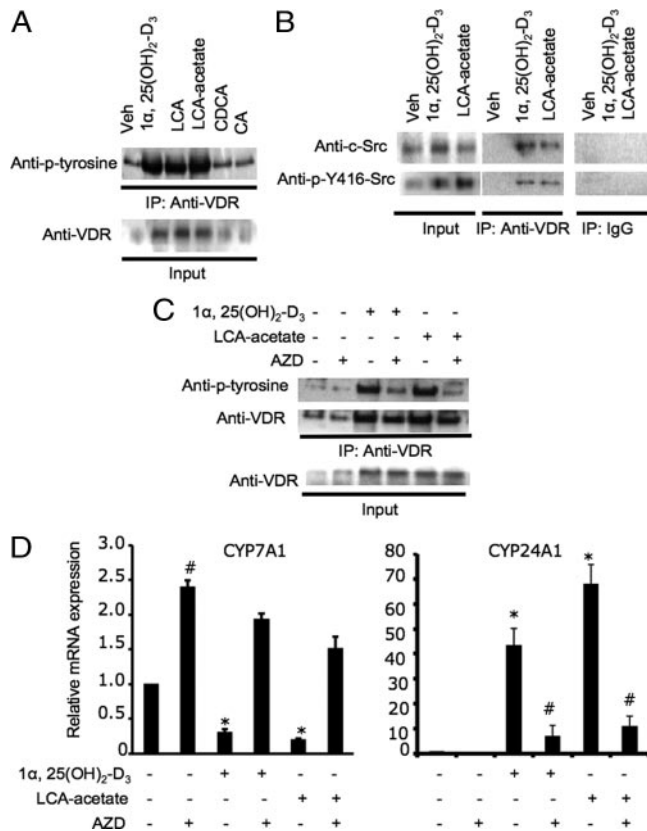

**FIG. 3.** Effect of VDR ligands on tyrosine phosphorylation and interaction of VDR and c-Src, and CYP7A1 mRNA expression levels in human primary hepatocytes. **A**, IP assay of tyrosine phosphorylation of VDR in the plasma membrane. Primary human hepatocytes were treated with vehicle (Veh, EtOH), 1 $\alpha$ , 25(OH) $_2$ -D $_3$  (50 nM), LCA (10  $\mu$ M), LCA-acetate (10  $\mu$ M), CDCA (20  $\mu$ M), or CA (20  $\mu$ M) for 6 h. A rabbit anti-VDR antibody was used to immunoprecipitate VDR from cell membrane extracts (300  $\mu$ g). A mouse antiphosphotyrosine (Anti-p-Tyr) was used to detect phosphotyrosines in VDR. Cell extract (10%) was set aside as input. **B**, Co-IP assay of VDR interaction with c-Src. Primary human hepatocytes were treated with Veh, 1 $\alpha$ , 25(OH) $_2$ -D $_3$  (50 nM), or LCA-acetate (10  $\mu$ M) for 6 h. Cell membrane extracts (300  $\mu$ g) were treated with a mouse anti-VDR antibody, and immunoprecipitates were used for immunoblot analysis of coprecipitated c-Src using rabbit anti-c-Src and anti-p-Y416/Y419-Src antibodies. Mouse nonimmune IgG was used as a negative control. Cell extract (10%) was set aside as input. **C**, Effect of a c-Src inhibitor on tyrosine phosphorylation of VDR in the plasma membrane. Primary human hepatocytes were treated with Veh, 1 $\alpha$ , 25(OH) $_2$ -D $_3$  (50 nM), LCA-acetate (10  $\mu$ M), and/or the c-Src inhibitor AZD0530 (AZD) (5  $\mu$ M) for 6 h. A rabbit anti-VDR antibody was used to immunoprecipitate VDR from cell membrane extracts (300  $\mu$ g). A mouse antiphosphotyrosine (Anti-p-Tyr) was used to detect phosphotyrosines in VDR. A mouse anti-VDR was used to detect immunoprecipitated VDR. Cell extract (10%) was set aside as input. **D**, Q-RT-PCR assay of the effects of a c-Src inhibitor on CYP7A1 (left panel) and CYP24A1 (right panel) mRNA expression in primary human hepatocytes. Primary human hepatocytes were treated with Veh, 1 $\alpha$ , 25(OH) $_2$ -D $_3$  (50 nM), LCA-acetate (10  $\mu$ M), and/or AZD (5  $\mu$ M) for 16 h. #, Statistically significant difference ( $P < 0.05$ ;  $n = 3$ ), AZD-treated vs. vehicle control, or AZD and 1 $\alpha$ , 25(OH) $_2$ -D $_3$  (50 nM) or LCA-acetate (10  $\mu$ M) treated vs. 1 $\alpha$ , 25(OH) $_2$ -D $_3$  (50 nM) or LCA-acetate (10  $\mu$ M) treated vs. vehicle control. Data represent one of three separate experiments using primary human hepatocytes from different liver donors (HH1479, HH1483, and HH1493).

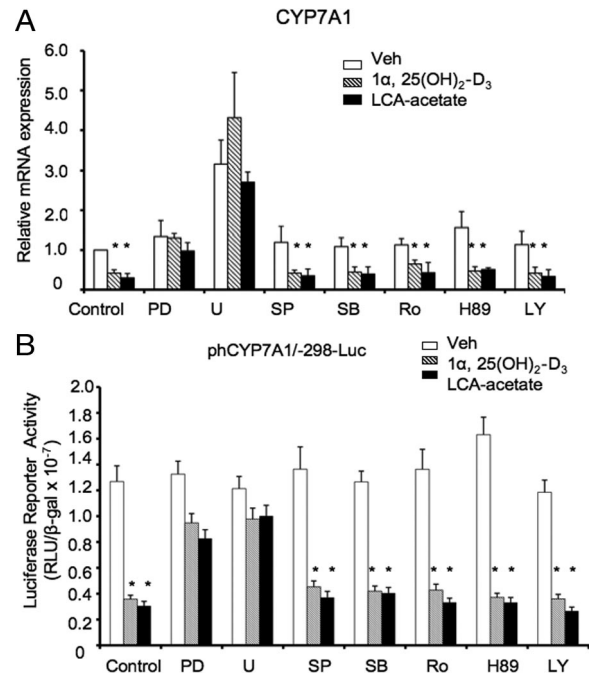

**FIG. 4.** Identification of 1 $\alpha$ , 25(OH) $_2$ -D $_3$  and LCA-activated protein kinase involved in inhibition of CYP7A1 gene transcription in human hepatocytes. **A**, Real-time PCR analysis of relative CYP7A1 mRNA expression in primary human hepatocytes treated with kinase inhibitors. Primary human hepatocytes were pretreated with each inhibitor for 1 h, followed by the treatment with 1 $\alpha$ , 25(OH) $_2$ -D $_3$  (50 nM) or LCA-acetate (10  $\mu$ M) for 24 h. Protein kinase inhibitors used are ERK1/2 inhibitors, PD98059 (PD, 40  $\mu$ M), and MEK1/2 U0126 (U, 20  $\mu$ M); JNK inhibitor, SP600125 (SP, 25  $\mu$ M); p38 inhibitor, SB203580 (SB, 20  $\mu$ M); PKC inhibitor, Ro318220 (Ro, 2.5  $\mu$ M); PKA inhibitor, H89 (10  $\mu$ M); and PI3K inhibitor, LY294002 (LY, 50  $\mu$ M). **B**, Transient transfection assay of the effect of kinase inhibitors on CYP7A1 promoter/luciferase reporter activity in HepG2 cells. A human CYP7A1/luciferase reporter, phCYP7A1/-298-Luc, was transfected into HepG2 cells pretreated with PD (40  $\mu$ M), U (20  $\mu$ M), SP (25  $\mu$ M), SB (20  $\mu$ M), Ro (2.5  $\mu$ M), H89 (10  $\mu$ M), or LY (50  $\mu$ M) for 1 h, followed by treatment with 1 $\alpha$ , 25(OH) $_2$ -D $_3$  (5 nM), or LCA-acetate (5  $\mu$ M) for 16 h. The luciferase activity was normalized by  $\beta$ -gal activity. Each experiment was done in duplicate, and the same experiment was repeated four times. Ethanol was used as a vehicle control. Data were pooled from assays using three donor hepatocytes (nos. HH1467, HH1471, and HH1472). \*, Statistically significant difference ( $P < 0.05$ ;  $n = 3$ ), treated vs. vehicle control. RLU, Relative light units.

c-Raf is an upstream serum kinase of the MEK1/2. Figure 5A shows that both LCA-acetate and 1 $\alpha$ , 25(OH) $_2$ -D $_3$  caused rapid serine phosphorylation of c-Raf in 10 min and reached the maximum after 6 h treatment. Similarly, both LCA-acetate and 1 $\alpha$ , 25(OH) $_2$ -D $_3$  time-dependently activated ERK1/2 by phosphorylation (Fig. 5B). Figure 5C shows that 1 $\alpha$ , 25(OH) $_2$ -D $_3$  or LCA-acetate stimulated phosphorylation of MEK1/2, an upstream kinase of ERK1/2. Furthermore, LCA-acetate and 1 $\alpha$ , 25(OH) $_2$ -D $_3$ -induced phosphorylation of ERK1/2 was abolished by a specific inhibitor for ERK1/2 (PD98059) and MEK1/2 (U0126), but not for JNK (SP600125), p38 (SB203580), and PKC (Ro318220) (Fig. 5D). These results demon-

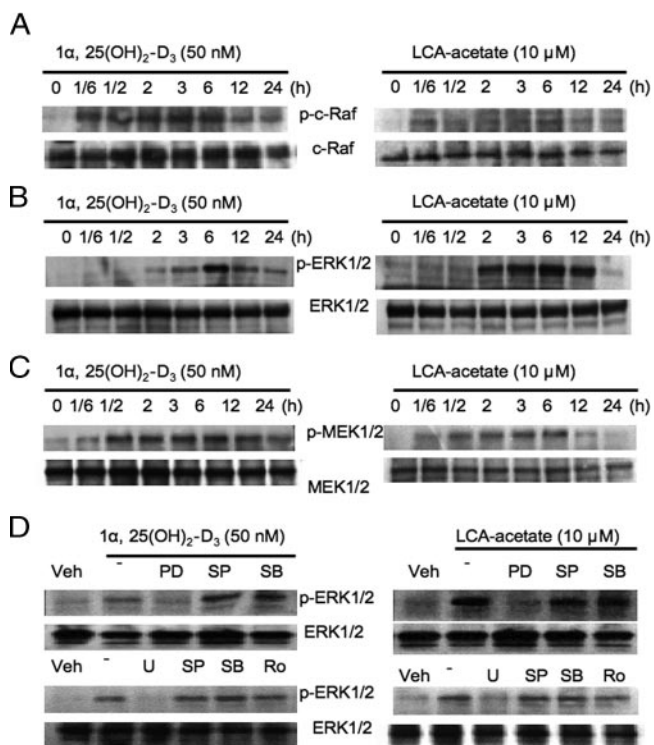

**FIG. 5.** Effects of LCA-acetate and  $1\alpha,25(\text{OH})_2\text{-D}_3$  phosphorylation of c-Raf, MEK1/2, and MAPKs in primary human hepatocytes. Primary human hepatocytes were treated with  $1\alpha,25(\text{OH})_2\text{-D}_3$  (50 nM) or LCA-acetate (10  $\mu\text{M}$ ) for the time indicated, and total cellular protein extracts were isolated for immunoblot analysis. A, Immunoblot assay of the effects of LCA-acetate and  $1\alpha,25(\text{OH})_2\text{-D}_3$  on serine phosphorylation of c-Raf. Phosphorylated c-Raf and c-Raf were detected using rabbit anti-p-c-Raf and anti-c-Raf antibodies. B, Immunoblot assay of the effects of  $1\alpha,25(\text{OH})_2\text{-D}_3$  and LCA-acetate on MAPKs ERK1/2. Total and phosphorylated ERK1/2 were detected by their respective antibodies. C, Immunoblot assay of the effects of  $1\alpha,25(\text{OH})_2\text{-D}_3$  and LCA-acetate on phosphorylation of MEK. Phosphorylated MEK and total MEK were detected by their respective antibodies. D, Effect of MAPK inhibitors on  $1\alpha,25(\text{OH})_2\text{-D}_3$  and LCA-acetate activation of ERK1/2. Primary human hepatocytes were pretreated with ERK1/2 inhibitors, PD (40  $\mu\text{M}$ ) and U (20  $\mu\text{M}$ ); JNK inhibitor, SP (25  $\mu\text{M}$ ); p38 inhibitor, SB (20  $\mu\text{M}$ ); or PKC inhibitor, Ro318220 (Ro, 2.5  $\mu\text{M}$ ) for 1 h, followed by treatment with  $1\alpha,25(\text{OH})_2\text{-D}_3$  (50 nM) or LCA-acetate (10  $\mu\text{M}$ ) for 6 h. Total cellular protein extracts were isolated for immunoblot analysis using an antibody against total or phosphorylated ERK1/2. Data represent one of four separate experiments using different donor hepatocytes (HH1467, HH1471, HH1472, and HH1479).

strated that VDR signaling specifically activated the c-Raf/MEK1/2/ERK1/2 pathway in human hepatocytes.

### ERK1/2 phosphorylates VDR and RXR $\alpha$

To further confirm that the VDR ligand-dependent phosphorylation is involved in LCA-acetate and  $1\alpha,25(\text{OH})_2\text{-D}_3$  inhibition of human CYP7A1 mRNA expression, a serine phosphatase inhibitor, okadaic acid (OA), was used to treat primary human hepatocytes together with LCA-acetate and  $1\alpha,25(\text{OH})_2\text{-D}_3$ . Whereas OA alone had no effect on CYP7A1 mRNA expression, the OA treatment significantly enhanced LCA-acetate

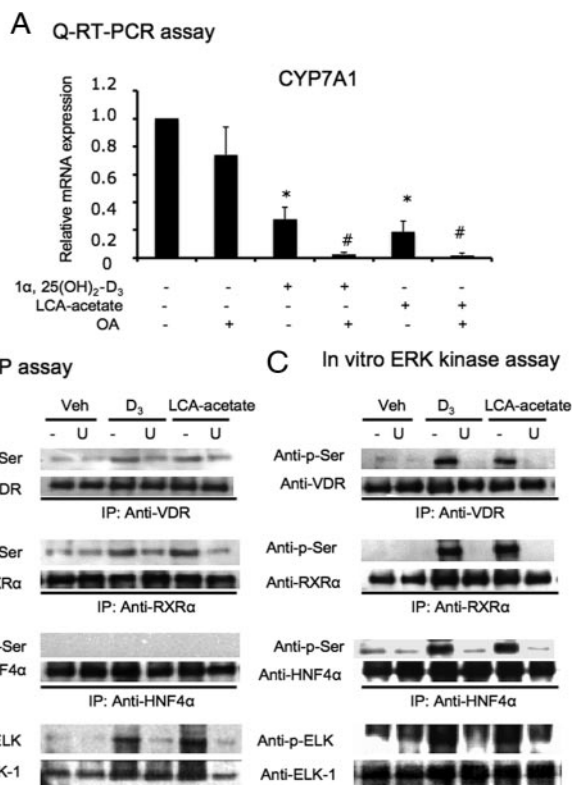

**FIG. 6.** Effects of VDR ligands on CYP7A1 mRNA expression and phosphorylation of VDR, RXR $\alpha$ , and HNF4 $\alpha$  in human hepatocytes. A, Q-RT-PCR assay of the effects of a protein phosphatase inhibitor, OA, on CYP7A1 mRNA expression in primary human hepatocytes. Primary human hepatocytes were treated with vehicle (Veh),  $1\alpha,25(\text{OH})_2\text{-D}_3$  (50 nM), LCA-acetate (10  $\mu\text{M}$ ), and OA (40 nM) as indicated for 16 h. Data were pooled from three donor hepatocytes (HH1479, HH1483, and HH1493). \*, Statistically significant difference between  $1\alpha,25(\text{OH})_2\text{-D}_3$  or LCA-acetate-treated and untreated;  $P < 0.05$ ;  $n = 3$ . #, Statistically significant difference between OA and  $1\alpha,25(\text{OH})_2\text{-D}_3$ - or LCA-acetate-treated and untreated control,  $P < 0.05$ ;  $n = 3$ . B, IP assay of serine phosphorylation of VDR, RXR $\alpha$ , and HNF4 $\alpha$ . Primary human hepatocytes were pretreated with U (20  $\mu\text{M}$ ) for 1 h followed by  $1\alpha,25(\text{OH})_2\text{-D}_3$  (50 nM) or LCA-acetate (10  $\mu\text{M}$ ) for 6 h. Rabbit anti-VDR, rabbit anti-RXR $\alpha$ , and goat anti-HNF4 $\alpha$  antibodies were used to immunoprecipitate VDR, RXR $\alpha$ , and HNF4 $\alpha$  from total cell protein extracts (300  $\mu\text{g}$ ), respectively. Antibodies against total and serine-phosphorylated VDR, RXR $\alpha$ , and HNF4 $\alpha$  were used for immunoblot analysis. An ERK1/2 target, ELK-1, was monitored as a positive control. C, *In vitro* ERK assay. Primary human hepatocytes were pretreated with U (20  $\mu\text{M}$ ) for 1 h followed by treatment with  $1\alpha,25(\text{OH})_2\text{-D}_3$  (50 nM) or LCA-acetate (10  $\mu\text{M}$ ) for 6 h. Beads coated with an antibody against phospho-ERK1/2 were incubated with cell extracts (300  $\mu\text{g}$ ) to immobilize phosphorylated ERK1/2 at 4 C overnight. The beads were used to phosphorylate *in vitro* synthesized VDR, RXR $\alpha$ , and HNF4 $\alpha$ . Antibodies against VDR, RXR $\alpha$ , and HNF4 $\alpha$  were used to immunoprecipitate respective nuclear receptors. Antibodies against total and phosphorylated VDR, RXR $\alpha$ , and HNF4 $\alpha$  were used for immunoblot analysis. ERK1/2 phosphorylation of ELK-1 was monitored as a positive control. Data represent one of three separate experiments using different donor hepatocytes (HH1479, HH1482, and HH1483). Q-RT-PCR, Quantitative real-time PCR; U, U0126.

and  $1\alpha,25(\text{OH})_2\text{-D}_3$  inhibition of CYP7A1 mRNA expression in primary hepatocytes (Fig. 6A). These data provided further evidence that serine phosphorylation was involved in mediating VDR signaling in human hepa-

toocytes. We also performed immunoprecipitation (IP) assay and *in vitro* kinase assay to investigate the possibility that the VDR/ERK1/2 signaling pathway may phosphorylate VDR, RXR $\alpha$ , and HNF4 $\alpha$  in human primary hepatocytes. HNF4 $\alpha$  is a major transcription factor involved in basal transcription of the *CYP7A1* gene. Cells were pretreated with U0126, followed by the treatment with LCA-acetate or 1 $\alpha$ ,25(OH) $_2$ -D $_3$ . Serine phosphorylation was detected by a mouse monoclonal antiphosphorylated serine antibody (anti-p-serine). Figure 6B shows that LCA-acetate or 1 $\alpha$ ,25(OH) $_2$ -D $_3$  induced serine phosphorylation of VDR and RXR $\alpha$ , but not HNF4 $\alpha$ , and U0126 blocked phosphorylation in this cell-based assay. We also performed a highly sensitive *in vitro* ERK1/2 assays. The same protein extracts isolated from primary hepatocytes were incubated with the beads coated with an antibody against phospho-ERK1/2 to immobilize activated p-ERK1/2 in cell extracts. The beads containing activated ERK1/2 were used to perform *in vitro* phosphorylation of *in vitro* synthesized VDR, RXR $\alpha$ , and HNF4 $\alpha$ . Immunoblot analysis using an antiphosphoserine antibody shows that VDR and RXR $\alpha$  were phosphorylated by active ERK1/2, and U0126 blocked the phosphorylation (Fig. 6C). In contrast to IP assay, this ERK assay showed that ERK1/2 was able to phosphorylate HNF4 $\alpha$ . The ERK1/2 assay used activated-ERK1/2 in hepatocytes to phosphorylate HNF4 $\alpha$ . This method is much more sensitive than the IP assay. HNF4 $\alpha$  is known to be phosphorylated by many kinases including PKA, PKB, PKC, and AMP-activated protein kinase, and phosphorylated HNF4 $\alpha$  has lower DNA binding, dimerization, and transactivation activity (review in Ref. 24). These results demonstrated that LCA-acetate and 1 $\alpha$ ,25(OH) $_2$ -D $_3$  induced serine phosphorylation of nuclear VDR, RXR $\alpha$ , and HNF4 $\alpha$  in human hepatocytes.

### VDR ligand-dependent interaction of VDR and HNF4 $\alpha$ and effect of coactivators and corepressors

We reported previously that VDR interacted with HNF4 $\alpha$  (14). To further test the role of ERK1/2 in mediating VDR interaction with HNF4 $\alpha$ , primary hepatocytes were incubated with U0126 for 1 h followed by treatment with LCA-acetate or 1 $\alpha$ ,25(OH) $_2$ -D $_3$  for 6 h and then immunoprecipitated with anti-HNF4 $\alpha$  or anti-VDR antibodies. Figure 7A shows that VDR and HNF4 $\alpha$  were coimmunoprecipitated in the cell extracts isolated from primary hepatocytes pretreated with LCA-acetate or 1 $\alpha$ ,25(OH) $_2$ -D $_3$ . The interaction was blocked by pretreatment with U0126, suggesting that ERK1/2-mediated phosphorylation of VDR and HNF4 $\alpha$  may stimulate VDR and HNF4 $\alpha$  interaction. We used mammalian two-hybrid assays to further study VDR interaction with co-

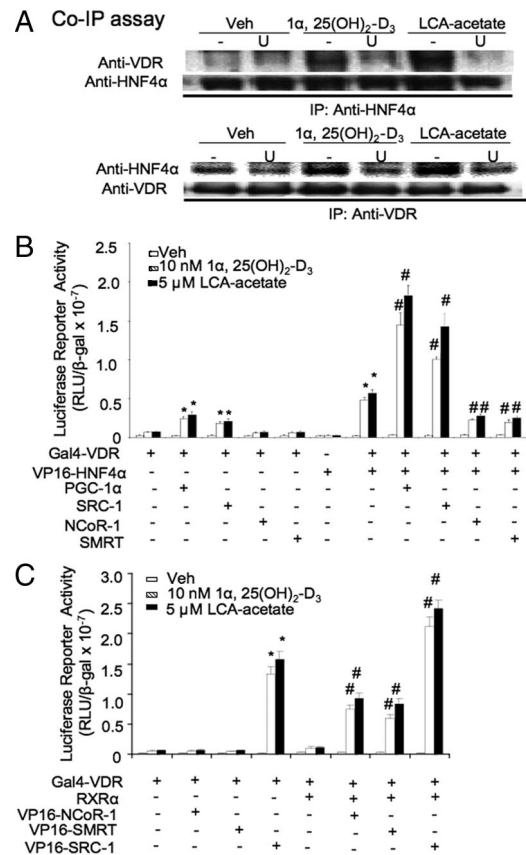

**FIG. 7.** VDR ligand-dependent interaction of VDR with HNF4 $\alpha$ , RXR $\alpha$ , coactivators, and corepressors. **A**, Effect of an ERK1/2 pathway inhibitor on VDR and HNF4 $\alpha$  interaction. Primary human hepatocytes were pretreated with U (20  $\mu$ M) for 1 h followed by treatment with 1 $\alpha$ ,25(OH) $_2$ -D $_3$  (50 nM) or LCA-acetate (10  $\mu$ M) for 6 h. An anti-HNF4 $\alpha$  or anti-VDR antibody was used to immunoprecipitate VDR and HNF4 $\alpha$  in the cell extracts (300  $\mu$ g). Coimmunoprecipitated VDR and HNF4 $\alpha$  were detected by immunoblot assay. **B**, Mammalian two-hybrid assay of VDR and HNF4 $\alpha$  interaction and effect of coactivators and corepressors. The Gal4 reporter construct p5XUAS-TK-Luc (0.2  $\mu$ g) was transfected with 0.1  $\mu$ g of Gal4-VDR with VP16 empty vector, pcDNA3.1, VP16-HNF4 $\alpha$ , PGC-1 $\alpha$ , SRC-1, NCoR-1, and/or SMRT, as indicated, into HEK293 cells. After transfected for 24 h, cells were treated with vehicle (EtOH), 1 $\alpha$ ,25(OH) $_2$ -D $_3$  (10 nM), or LCA-acetate (5  $\mu$ M) for 16 h before harvesting. The experiment was done in duplicate, and the same experiment was repeated three times. \*, Statistically significant difference ( $P < 0.05$ ,  $n = 3$ ) Gal4-VDR cotransfected with PGC-1 $\alpha$ , SRC-1, or VP16-HNF4 $\alpha$  vs. Gal4-VDR cotransfected with VP16 empty vector or pcDNA3.1. #, Statistically significant difference ( $P < 0.05$ ;  $n = 3$ ) Gal4-VDR and VP16-HNF4 $\alpha$  cotransfected with PGC-1 $\alpha$ , SRC-1, SMRT, or NCoR-1 and VP16-HNF4 $\alpha$  cotransfected with pcDNA3.1. **C**, Mammalian two-hybrid assays of effect of RXR $\alpha$  on VDR interaction with NCoR-1, SMRT, or SRC-1. The GAL4 reporter construct p5XUAS-TK-Luc (0.2  $\mu$ g) was cotransfected with 0.1  $\mu$ g Gal4-VDR, RXR $\alpha$ , VP16 empty vector, pcDNA3.1, VP16-NCoR-1, VP16-SMRT, and/or VP16-SRC-1, as indicated, into HEK293 cells. After transfection for 24 h, cells were treated with vehicle (Veh, EtOH), 1 $\alpha$ ,25(OH) $_2$ -D $_3$  (10 nM), or LCA-acetate (5  $\mu$ M) for 16 h before harvesting. \*, Statistically significant difference ( $P < 0.05$ ,  $n = 3$ ) Gal4-VDR cotransfected with VP16-SRC-1 vs. Gal4-VDR cotransfected with VP16 empty vector. #, Statistically significant difference ( $P < 0.05$ ,  $n = 3$ ) Gal4-VDR and RXR $\alpha$  cotransfected with VP16-NCoR-1, VP16-SMRT, or VP16-SRC-1 vs. Gal4-VDR and RXR $\alpha$  cotransfected with VP16 empty vector. All transfection experiments were done in duplicate, and the same experiment was repeated three times. RLU, Relative light units; U, U0126.

activators and corepressors. Figure 7B shows that Gal4-VDR and VP16-HNF4 $\alpha$  interaction was VDR ligand dependent. Peroxisomal proliferator-activated receptor- $\gamma$  coactivator 1 $\alpha$  (PGC-1 $\alpha$ ) and steroid receptor coactivator 1 (SRC-1) strongly stimulated the interaction, whereas nuclear receptor corepressor 1 (NCoR-1) and silencing mediator of retinoid and thyroid hormone receptor (SMRT) strongly inhibited VDR and HNF4 $\alpha$  interaction in the presence of VDR ligands. Figure 7C shows that Gal4-VDR did not interact with VP16-NCoR-1 or VP16-SMRT. Interestingly, when RXR $\alpha$  was cotransfected, Gal4-VDR interacted with VP16-NCoR-1 and VP16-SMRT in a VDR ligand-dependent manner. These data demonstrated that VDR did not interact with NCoR-1 and SMRT, and that NCoR-1 or SMRT inhibited the interaction of VDR with HNF4 $\alpha$ , PGC-1 $\alpha$ , and SRC-1 in a VDR ligand-dependent manner.

### VDR is a positive regulator of CYP24A1 gene transcription in human hepatocytes

Previously we reported that ligand-activated VDR induced CYP24A1 mRNA expression in human hepatocytes (14). To further confirm that VDR can positively regulate a known VDR-induced gene in human hepatocytes, we performed transient transfection assay of CYP24A1 reporter activity in HepG2 cells. Figure 8A shows that activation of VDR by LCA-acetate or 1 $\alpha$ ,25(OH) $_2$ -D $_3$  strongly stimulated the human CYP24A1/Luc reporter activity. Cotransfection with PGC-1 $\alpha$  induced CYP24A1 reporter activity by 2-fold because PGC-1 $\alpha$  is a coactivator of VDR. On the other hand, cotransfection with NCoR-1 or SMRT reduced reporter activity by more than 60%. It should be noted that both coactivator and corepressor effect on VDR induction of CYP24A1 is dependent on VDR ligands. In contrast, ligand-activated VDR/RXR $\alpha$  repressed CYP7A1/Luc reporter activity (Fig. 8B). PGC-1 $\alpha$  induced CYP7A1 reporter activity in the absence of VDR ligands. PGC-1 $\alpha$  is a potent coactivator of HNF4 $\alpha$ , which is a critical positive regulator of CYP7A1. NCoR-1 and SMRT strongly inhibited CYP7A1 reporter activity only when VDR was activated by its ligands. These results suggest that VDR is a positive regulation of CYP24A1 gene transcription in human hepatocytes.

### A MEK1/2/ERK1/2 inhibitor blocked VDR interaction with HNF4 $\alpha$ and coregulator recruitment to CYP7A1 promoter

We reported previously that LCA or 1 $\alpha$ ,25(OH) $_2$ -D $_3$  stimulated VDR, NCoR-1, and SMRT occupancy but inhibited HNF4 $\alpha$ , PGC1 $\alpha$ , and GRIP-1 occupancy to CYP7A1 promoter (14). Here we further studied the effect of U0126 on VDR ligand-induced alteration of CYP7A1 chromatin structure to confirm the role of the

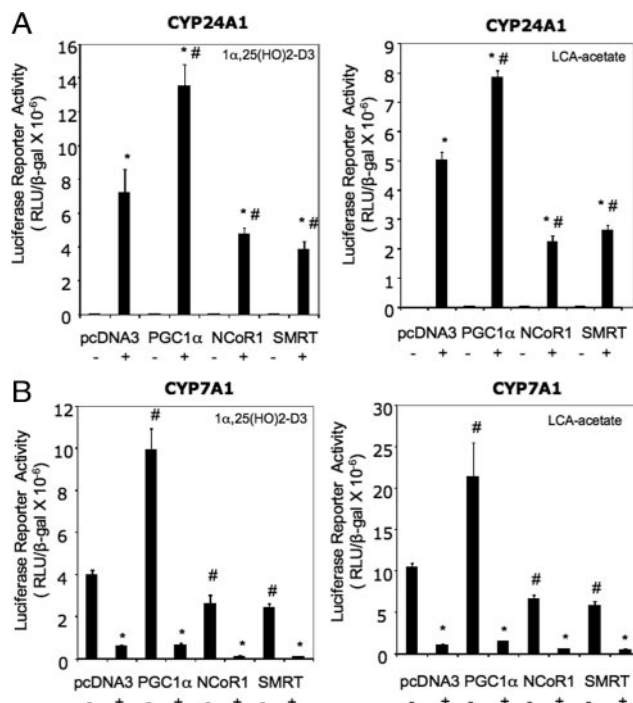

**FIG. 8.** Transient transfection assay of effects of coactivators and corepressors on CYP24A1 and CYP7A1 promoter reporter activity. A, Reporter assays of human CYP24A1 promoter/luciferase reporter, phCYP24A1-1200-Luc. B, Reporter assays of human CYP7A1 promoter/luciferase reporter, ph-1887Luc. Reporter plasmid (0.2  $\mu$ g) was cotransfected with VDR (0.1  $\mu$ g) and RXR $\alpha$  (0.1  $\mu$ g) expression plasmids or control plasmid (pcDNA3.1), and with expression plasmid (0.1  $\mu$ g) for PGC-1 $\alpha$ , NCoR-1, and SMRT, as indicated, into HepG2 cells for 24 h, followed by treatment with 1 $\alpha$ ,25(OH) $_2$ -D $_3$  (5 nM), or LCA-acetate (10  $\mu$ M), or vehicle (EtOH) for an additional 24 h. The luciferase activities were assayed as described in *Materials and Methods*. Each experiment was done in triplicate and expressed as mean  $\pm$  SD. \*, Statistically significant difference ( $P < 0.05$ ,  $n = 3$ ) vs. vehicle control with the same cotransfection. #, Statistically significant difference ( $P < 0.05$ ,  $n = 3$ ) vs. pcDNA3 cotransfected sample with the same treatment. RLU, Relative light units.

MEK1/2/ERK1/2 pathway in mediating VDR signaling. Figure 9A shows that 1 $\alpha$ ,25(OH) $_2$ -D $_3$  increased VDR and RXR $\alpha$  occupancy to human CYP7A1 promoter by about 4-fold but decreased HNF4 $\alpha$  occupancy by about 50%. LCA-acetate increased VDR and RXR $\alpha$  occupancy by about 10-fold but decreased HNF4 $\alpha$  occupancy by more than 50%. Both 1 $\alpha$ ,25(OH) $_2$ -D $_3$  and LCA-acetate increased recruitment of corepressors NCoR-1 and SMRT by about 2- to 4-fold but decreased recruitment of a coactivator PGC-1 $\alpha$  by about 80–90%. U0126 significantly reduced 1 $\alpha$ ,25(OH) $_2$ -D $_3$  or LCA-acetate-stimulated recruitment of VDR, RXR $\alpha$ , NCoR-1, and SMRT and increased HNF4 $\alpha$  and PGC-1 $\alpha$  recruitment to CYP7A1 promoter. These results confirmed that the MEK1/2/ERK1/2 pathway was involved in VDR signaling to promote VDR/RXR $\alpha$  heterodimer recruitment of corepressors to displace VDR/HNF4 $\alpha$  and coactivator complexes on CYP7A1 promoter.



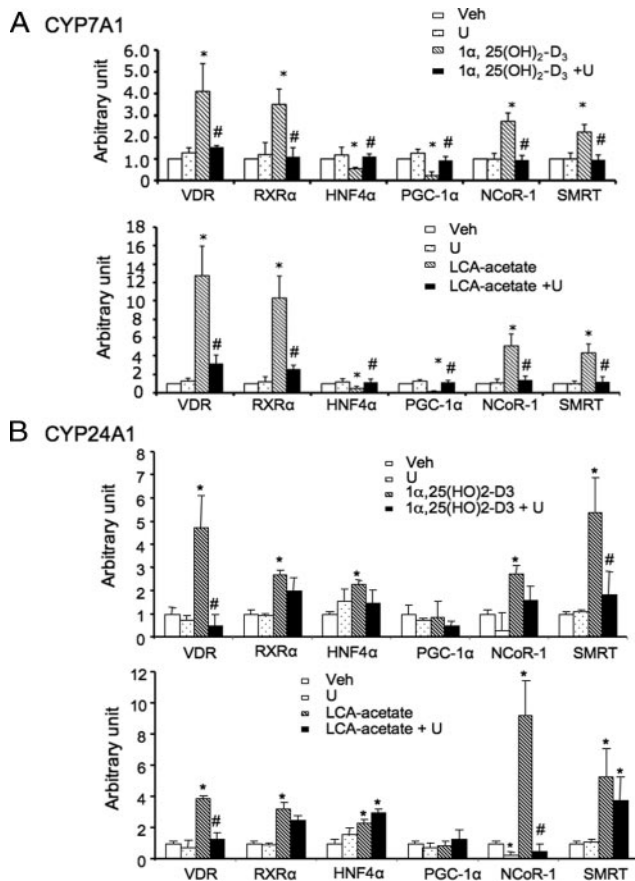

**FIG. 9.** ChIP assay of nuclear receptors and cofactors association with human *CYP7A1* promoter (A) and *CYP24A1* promoter (B). Primary human hepatocytes were pretreated with U0126 (U) (20  $\mu$ M) for 1 h followed by treatment with 1 $\alpha$ ,25(OH) $_2$ -D $_3$  (50 nM) or LCA-acetate (10  $\mu$ M) for 16 h. Rabbit anti-VDR, anti-RXR $\alpha$ , and anti-HNF4 $\alpha$  antibodies, and goat anti-PGC-1 $\alpha$ , anti-NCoR-1, and anti-SMRT antibodies were used to immunoprecipitate the chromatin fragments. Nonimmune IgG was used as a negative control. Cell extract (5%) was set aside as input. A, Taqman primer set probes were designed for Q-PCR to detect human *CYP7A1* promoter region containing BARE-II and BARE-II (HNF4 $\alpha$  and VDR/RXR $\alpha$  binding site) and intron 5 (+9127 to +9193) (a negative control), as described in *Materials and Methods*. B, Taqman primer set probes were designed for Q-PCR to detect VDRE in the proximal region of human *CYP24A1* promoter. Data were pooled from assays using three donor hepatocytes (HH1460, HH1479, and HH1483). \*, Statistically significant difference ( $P < 0.05$ ;  $n = 3$ ) vs. vehicle (Veh) control. #, Statistically significant difference ( $P < 0.05$ ;  $n = 3$ ) vs. LCA-acetate or 1 $\alpha$ , 25(OH) $_2$ -D $_3$  treatment.

We also performed a similar chromatin immunoprecipitation (ChIP) assay to detect VDR and coactivator binding to *CYP24A1* promoter. Figure 9B shows that 1 $\alpha$ ,25(OH) $_2$ -D $_3$  or LCA-acetate increased VDR and RXR $\alpha$  occupancy to human *CYP24A1* promoter. In contrast to *CYP7A1*, these VDR ligands increased HNF4 $\alpha$  occupancy to *CYP24A1* promoter. We performed adenovirus-mediated gene transduction of HNF4 $\alpha$  in human primary hepatocytes and found that Adeno-HNF4 $\alpha$  did not affect *CYP24A1* mRNA but strongly induced *CYP7A1* mRNA expression (data not shown). It is likely that HNF4 $\alpha$  interacts with VDR as a coactivator as we

reported previously (14). Both 1 $\alpha$ ,25(OH) $_2$ -D $_3$  and LCA-acetate increased recruitment of corepressors NCoR-1 and SMRT to *CYP24A1* promoter but did not have much effect on PGC-1 $\alpha$  binding. Interestingly, U0126 had no effect on recruitment of VDR, RXR, HNF4 $\alpha$ , PGC-1 $\alpha$ , NCoR-1, and SMRT to *CYP24A1* promoter but significantly reduced recruitment of NCoR-1 and SMRT to *CYP24A1* promoter. Thus the membrane VDR/MEK1/2/ERK1/2 MAPK signaling pathway also is involved in VDR recruitment of corepressors to inhibit *CYP24A1* gene transcript. In conclusion, these results demonstrated that ligand-activated VDR can either positively or negatively regulate its target gene transcription in human hepatocytes by recruiting coactivators and corepressors to VDR/RXR heterodimer. However, different mechanisms are involved in induction of *CYP24A1* and inhibition of *CYP7A1* (see *Discussion*).

## Discussion

In this study, we identified a novel membrane VDR-signaling pathway that might be involved in the inhibition of *CYP7A1* gene transcription by bile acids in human hepatocytes. As in other tissues and cells, VDR has both genomic and nongenomic actions in human liver cells. The nongenomic action of membrane VDR signaling is a very rapid response (in miniseconds or seconds) to cellular stimuli to activate cell-signaling pathways, whereas the genomic action of VDR is a relatively slower response (minutes to hours) to hormonal ligands by dimerization of VDR with RXR and recruitment of coactivators and/or corepressors to gene promoters to modulate the rate of target gene transcription (25). Figure 10 illustrates the proposed molecular mechanism of the coordinated genomic and nongenomic actions of VDR signaling pathway that inhibits *CYP7A1* gene expression in human hepatocytes. The VDR ligand 1 $\alpha$ ,25(OH) $_2$ -D $_3$  or LCA stimulates tyrosine phosphorylation of VDR and activation of c-Src. The tyrosine-phosphorylated VDR forms a complex with activated c-Src, which is translocated from the cytosol to the caveolae subdomain of the plasma membrane. Ligand-activated VDR is also translocated to the nucleus independently of tyrosine kinase pathways. The VDR/c-Src activates a G protein, Ras, and c-Raf (Raf-1) likely through the Shc/Grb2/Sos complex (19). The c-Raf activates the MEK1/2/ERK1/2 MAPK pathway, which then phosphorylates the nuclear VDR, RXR $\alpha$ , and HNF4 $\alpha$ . In this model the ligand-activated VDR/RXR $\alpha$  recruits corepressors NCoR-1 and SMRT to displace HNF4 $\alpha$  and coactivators PGC-1 $\alpha$  and SRC-1 complexes from binding to the BARE and results in inhibiting *CYP7A1* gene transcription. It has been well es-

## Human Hepatocyte

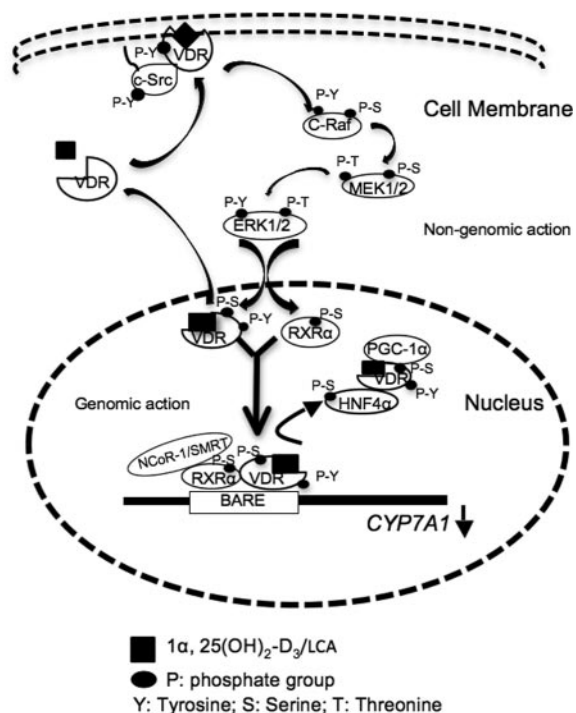

**FIG. 10.** A cartoon illustrates genomic and nongenomic actions of VDR signaling in inhibition of human CYP7A1 gene transcription in human hepatocytes. VDR ligands,  $1\alpha,25(\text{OH})_2\text{-D}_3$ , or LCA stimulate intracellular translocation of VDR to both the plasma membranes. VDR ligands induce tyrosine (Y) phosphorylation of VDR and activate c-Src. VDR interacts with c-Src in the plasma membrane. Membrane VDR signaling activates c-Raf, probably through activation of the Shc/Grb2/Sos complex and Ras (data not shown), which then activates c-Raf and subsequently the MEK1/2/ERK1/2 MAPK pathway. VDR is also translocated to the nucleus through interaction with a heat shock protein 70, independent of the tyrosine kinase pathway. ERK1/2 is translocated to the nucleus and subsequently phosphorylates the serine/threonine (S/T) residues on nuclear VDR, RXR $\alpha$ , and HNF4 $\alpha$ . The VDR/RXR $\alpha$  recruits corepressor NCoR-1 or SMRT to the BARE to displace the HNF4 $\alpha$ /VDR/PGC-1 $\alpha$  or SRC-1 complex and results in inactivating the CYP7A1 gene. It should be noted that NCoR-1/SMRT is recruited to RXR $\alpha$  that dimerizes with ligand-activated VDR. VDR interacts with HNF4 $\alpha$  and prevents HNF4 $\alpha$  from dimerization and binding to the BARE.

tablished that the HNF4 $\alpha$  homodimer binds to the BARE and interacts with PGC-1 $\alpha$  and SRC-1 on CYP7A1 promoter to stimulate CYP7A1 gene transcription (1). Phosphorylation of HNF4 $\alpha$  is known to reduce its dimerization and DNA binding activity (24), and thus allows VDR/RXR/NCOR-1/SMRT to bind to the BARE. It is also possible that VDR and HNF4 $\alpha$  may compete for coactivators, or VDR may interact with HNF4 $\alpha$  to prevent HNF4 $\alpha$  from dimerization and binding to the BARE. All these mechanisms may inhibit CYP7A1 gene transcription.

It is well established that  $1\alpha,25(\text{OH})_2\text{-D}_3$  exerts rapid biological responses by activating tyrosine phosphorylation-signaling pathways that activate intracellular  $\text{Ca}^{2+}$ -

activated protein kinase cascades leading to cell proliferation, differentiation, apoptosis, muscle growth, and the immune response (19). The Src family of tyrosine kinases plays a critical role in control of various cellular processes including cell adhesion, proliferation, survival, and motility (26). The tyrosine kinase activity of c-Src is mainly regulated by phosphorylation of two major tyrosine phosphorylation sites on human c-Src: one is in the tyrosine kinase domain (Y419) and another one is in the C terminus (Y530). Src is maintained in an inactive conformation with the SH2 domain engaged with Y530. Dephosphorylation of Y530 disrupts the intramolecular interaction between the SH2 domain and Y530 and results in autophosphorylation of Y419 and activation of c-Src. Binding of c-Src to growth factor receptor tyrosine kinase via the SH2 domain results in displacement of Y530 to allow Y419 phosphorylation and activation of c-Src. In this study, we demonstrated that LCA-acetate or  $1\alpha,25(\text{OH})_2\text{-D}_3$  was able to stimulate tyrosine phosphorylation of VDR. Binding of VDR to c-Src may cause autophosphorylation of Y419 on human c-Src and activate c-Src. We also provided the evidence that VDR and c-Src interacted in the plasma membrane. Furthermore, a specific c-Src inhibitor AZD0530 reduced VDR phosphorylation and the inhibitory effect of LCA-acetate and  $1\alpha,25(\text{OH})_2\text{-D}_3$  on CYP7A1 mRNA expression and abrogated their stimulatory effect on CYP24A1 expression in human hepatocytes. These results are consistent with the involvement of c-Src in membrane VDR signaling in human hepatocytes as in muscle and tumor cells. VDR signaling is known to stimulate several signaling pathways including AKT, ERK1/2, p38, and JNK1/2 kinases in bone, intestine, and muscle cells (18, 19, 27, 28). Interestingly, our results show that membrane VDR signaling only activates the MEK1/2/ERK1/2, but not PKA, PKB, PKC, p38, and JNK pathways in human hepatocytes. It appears that VDR signaling in human hepatocytes is highly specific and may have functions limited to cell proliferation and differentiation in hepatocytes.

Nuclear receptors recruit coactivators and corepressors to regulate target gene transcription. CYP24A1 is a well-characterized VDR target gene highly induced by  $1\alpha,25(\text{OH})_2\text{-D}_3$ . Agonists or ligands bind to VDR and induce a conformational change in the ligand-binding domain to expose the coactivator-binding surface to allow coactivator binding. Ligand-activated VDR forms a heterodimer with RXR and binds to the canonical DR3 (direct repeat spaced by three nucleotides)-type VDR response elements (VDREs) to induce CYP24A1 gene transcription (29, 30). However, the transrepression mechanism of VDR is unclear and controversial. VDR has been shown to interact with corepressors, such as

NCoR-1, SMRT, Alien, and Hairless (31–33). It has been reported that unliganded VDR interacts with a bipartite nuclear receptor interaction domain on SMRT and binds to the VDRE to inhibit *CYP24A1* gene transcription, whereas binding of a ligand to VDR abolishes VDR recruitment of SMRT to the VDREs and recruits coactivators to stimulate *CYP24A1* gene transcription (33). This mechanism is in contrast to a recent report that binding of an agonist or ligand to VDR enhances VDR dimerization with RXR and recruitment of both corepressors and coactivators to the VDRE on *CYP24A1* promoter (34). The relative amount of coactivators and corepressors present in different tissues may determine the expression levels of VDR target gene expression in different tissues.

This study shows that VDR functions as a repressor of the *CYP7A1* gene and an activator of *CYP24A1* gene in human hepatocytes. Different from the *CYP24A1* gene, the *CYP7A1* promoter does not have a DR3-type VDRE. Instead the  $1\alpha,25(\text{OH})_2\text{-D}_3$  or LCA-activated VDR/RXR $\alpha$  binds to BARE-I and BARE-II (also an HNF4 $\alpha$  site) in human *CYP7A1* proximal promoter (14). In this study, we showed that VDR interacted with NCoR-1 or SMRT only when RXR $\alpha$  and  $1\alpha,25(\text{OH})_2\text{-D}_3$  or LCA were present (Fig. 7C). This is consistent with the model that the RXR $\alpha$ , but not VDR, recruits corepressors to the VDR/RXR $\alpha$  heterodimer when activated by a VDR agonist (34). It was demonstrated that a VDR agonist induced a conformational change on helix 12 of VDR and subsequently altered the conformation of the AF2 domain on RXR $\alpha$  to expose the corepressor-binding surface. This active repression mechanism is different from that involved in  $1\alpha,25(\text{OH})_2\text{-D}_3$  feedback inhibition of  $1\alpha$ -hydroxylase (*CYP27B1*), an enzyme involved in activation of  $1\alpha,25(\text{OH})_2\text{-D}_3$ . The negative VDRE identified in the *CYP27B1* promoter has an E-box sequence that binds a basic helix-loop-helix protein named VDR-interacting receptor, which recruits ligand-activated VDR/RXR, corepressors, and William Syndrome transcription factor to inhibit *CYP27B1* gene transcription (35). It appears that VDR binds to different VDREs to regulate *CYP7A1*, *CYP24A1*, and *CYP27B1* gene expression by different mechanisms. Furthermore,  $1\alpha,25(\text{OH})_2\text{-D}_3$  signaling may regulate gene transcription by epigenetic mechanisms involving histone acetylation and DNA methylation (35, 36).

Bile acids are known to activate several cell signaling pathways in hepatocytes, such as FGF receptor 4, Fas receptor, epidermal growth factor receptor, G $\alpha$ i protein-coupled receptor, and TNF receptor (2). These signaling pathways activate JNK, ERK, and p38 MAPK pathways to regulate bile acid and glucose metabolism. In this study we identified a novel bile acid-activated membrane recep-

tor, VDR, which may cross talk with bile acid-activated growth factor receptor signaling via the c-Src/ERK pathway. Recently, a G $\alpha$ s protein-coupled receptor TGR5 (M-BAR) has been identified as a membrane bile acid receptor (37). Although TGR5 binds to various free and conjugated bile acids, LCA and taurine-conjugated LCA are the most efficacious activators of TGR5 (37, 38). The TGR5 and VDR signaling activate distinct pathways and have different physiological functions. TGR5 activates cAMP/PKA signaling that regulates energy metabolism in brown adipose tissues (39). TGR5 is widely expressed in many tissues but not in hepatocytes (38).

In conclusion, this study identifies a novel bile acid-activated VDR-signaling pathway that inhibits *CYP7A1* gene transcription in human hepatocytes by both genomic and nongenomic actions. Ligand-activated VDR is translocated from the cytosol to the plasma membrane and nucleus. The VDR-dependent signaling specifically activates the c-Raf/MEK1/2/ERK1/2 pathway to inhibit *CYP7A1* gene transcription in human hepatocytes. LCA activation of the membrane VDR-signaling pathway may be a rapid response to sudden increase of cholestatic bile acids in human hepatocytes during cholestasis to inhibit bile acid synthesis and protect the liver from cholestatic injury. LCA derivatives may be selective VDR modulators that have therapeutic potential for treating liver diseases (40).

## Materials and Methods

### Materials

Human *CYP7A1* reporter, phCYP7A1/298, and phCYP7A1-1887, and human *CYP27A1* reporter, phCYP27A1/1774, were constructed as previously described (41–43). Human *CYP24A1*/luciferase reporter, phCYP24A1/1200-Luc (nucleotides –1200 to +120), was kindly provided by Dr. P. MacDonald (Case Western Reserve University School of Medicine, Cleveland, OH).

Expression plasmid for human VDR (pcDNA3.1/VDR) was provided by Dr. Y.C. Li (University of Chicago, Chicago, IL). LCA, CA, and CDCA were purchased from Sigma-Aldrich (St. Louis, MO). LCA-acetate was from Steraloids, Inc. (Newport, RI). Specific inhibitors for ERK1/2 (PD98059), MEK1/2 (U0126), JNK (SP600125), p38 (SB203580), PKC (Ro318220), PKA (H89), and PI3K (LY294002) were obtained from EMD Chemicals, Inc. (Gibbstown, NJ). The c-Src inhibitor, AZD0530, was purchased from Selleck Chemicals LLC (Shanghai, China). A protein phosphatase inhibitor, okadaic acid, was purchased from Sigma-Aldrich. Rabbit (sc-1009) and mouse (sc-13133) anti-VDR, rabbit (sc-533) and mouse (sc-46659) anti-RXR $\alpha$ , rabbit (sc-8981) and goat (sc-6556) anti-HNF4 $\alpha$ , goat anti-PGC-1 $\alpha$ , goat anti- $\beta$ -actin, goat anti-NCoR-1, rabbit anti-SMRT, goat antilamin B, rabbit anticaveolin-1, and mouse antiphosphorylated tyrosine antibodies were purchased from Santa Cruz Biotechnology, Inc. (Santa Cruz, CA). Mouse anti-pan-cadherin was purchased from Abcam, Inc. (Cambridge, MA). Mouse antiphosphorylated serine antibody was purchased from GE Healthcare Bio-Sciences Corp. (Piscataway, NJ). Rabbit antiphosphorylated ERK1/2 (Thr202/Tyr204), JNK

(Thr183/Tyr185), p38 (Thr180/Tyr182), MEK1/2 (Ser217/221), c-Raf (Ser338), c-Src (Tyr416), and ELK-1 (Ser383) antibodies were purchased from Cell Signaling Technology, Inc. (Lake Placid, NY).

### Cell culture

Human hepatoblastoma cell line HepG2 (American Type Culture Collection, Manassas, VA) was cultured as described previously (44). Primary human hepatocytes were isolated from human donors and were obtained through the Liver Tissue and Cells Distribution System of National Institutes of Health (Dr. S. Strom, University of Pittsburgh, Pittsburgh, PA). Cells were maintained in hepatocyte maintenance medium as described previously (44).

### Immunofluorescence microscopy

Primary human hepatocytes were treated with vehicle (EtOH),  $1\alpha,25(\text{OH})_2\text{-D}_3$  (50 nM), LCA (10  $\mu\text{M}$ ), LCA-acetate (10  $\mu\text{M}$ ), or cholic acid (25  $\mu\text{M}$ ) for 6 h. Cells were fixed with 4% paraformaldehyde and permeable with 0.2% Triton X-100. Rabbit anti-VDR antibody (Santa Cruz) and Alexa Fluor 488-conjugated antirabbit IgG antibody (Molecular Probes, Carlsbad, CA) were used for detection of VDR. Mouse anticaveolin-1 antibody (Abcam, Inc.) and Alexa Fluor 546-conjugated antimouse IgG antibody (Molecular Probes) were used for detection of caveolin-1. Cell nuclei were stained with TO-PRO-3 (Molecular Probes). Stained cells were imaged under the confocal microscope Olympus Fluoview FV300 (Olympus, Center Valley, PA).

### Transient transfection assay

HepG2 cells were grown to about 80% confluence in 24-well tissue culture plates, and treated with LCA-acetate (Steraloids) or  $1\alpha,25(\text{OH})_2\text{-D}_3$  (Cayman Chemicals, Ann Arbor, MI). Luciferase reporters and expression plasmids were transfected into HepG2 cells using Tfx-20 reagent (Promega Corp., Madison, WI) following manufacturer's instructions. Luciferase reporter assays were performed as previously described (41). Assays were performed in duplicate, and each experiment was repeated at least four times. Data were expressed as means  $\pm$  SD.

### RNA isolation and quantitative real-time PCR

Primary human hepatocytes were maintained in serum-free media overnight. Cells were treated with  $1\alpha,25(\text{OH})_2\text{-D}_3$  or LCA-acetate in the amounts and times indicated. Total RNA was isolated using Tri-Reagent (Sigma-Aldrich). Reverse-transcription reactions were performed using RETROscript kit (Ambion, Austin, TX). Real-time quantitative PCR (Q-PCR) assays of relative mRNA expression were performed as previously described (44) using an ABI PRISM 7500 sequence detector (Applied Biosystems, Foster City, CA). TaqMan PCR primers and probes were ordered from TaqMan Gene Expression Assays (Applied Biosystems). Data were analyzed using the Sequence Detector version 1.7 software (Applied Biosystems). Relative mRNA expression levels were calculated by the  $\Delta\Delta\text{Ct}$  method recommended by Applied Biosystems (User Bulletin no. 2, 1997). All PCRs were done in duplicate, and each reaction was repeated at least four times.

### Protein extraction and immunoblot assay

To isolate total cell protein extracts, primary human hepatocytes (in T25 flasks) were lysed in modified radioimmunopre-

cipitation assay buffer (50 mM Tris-HCl, 1% Nonidet P-40, 0.25% deoxycholate, 150 mM NaCl, 1 mM EDTA) containing protease inhibitors (1 mM phenylmethylsulfonyl fluoride, 1  $\mu\text{g}/\text{ml}$  aprotinin, 1  $\mu\text{g}/\text{ml}$  pepstatin; Sigma-Aldrich) for 30 min. Cytoplasmic and nuclear fractions were isolated using a Nuclear Extraction kit (Millipore Corp., Billerica, MA) following manufacturer's instructions. Plasma membrane fractions were isolated using a Plasma Membrane Protein Extraction kit (Biovision, Inc., Mountain View, CA) following manufacturer's instructions. Protein samples were subjected to SDS-PAGE for immunoblot analysis using specific antibodies and detected by enhanced chemiluminescence detection kit (GE Healthcare Bio-Sciences Corp.).

### IP and co-IP assays

Primary human hepatocytes in T25 flasks were maintained in serum-free media overnight and treated with various compounds as indicated. For IP assays, cellular protein extracts (300  $\mu\text{g}$ ) were incubated with 10  $\mu\text{g}$  rabbit anti-VDR, rabbit anti-RXR $\alpha$ , or goat anti-HNF4 $\alpha$  (Santa Cruz Biotechnology, Inc.) at 4 C with rotation overnight, followed by an additional incubation with Protein A agarose beads for 2 h. The beads were then washed three times with cold  $1\times$  PBS, boiled in  $2\times$  protein loading buffer for 5 min, and subjected to SDS-PAGE, followed by immunoblot analysis with mouse antiphosphoserine, mouse antiphosphotyrosine (GE Healthcare Bio-Sciences Corp.), mouse anti-VDR, mouse anti-RXR $\alpha$ , and rabbit anti-HNF4 $\alpha$  antibodies (Santa Cruz Biotechnology, Inc.). For co-IP assays of VDR interaction with HNF4 $\alpha$ , rabbit anti-VDR or goat anti-HNF4 $\alpha$  antibody was used to coimmunoprecipitate VDR and HNF4 $\alpha$  in cellular protein extracts. Mouse anti-VDR or rabbit anti-HNF4 $\alpha$  antibody was used to detect coprecipitated VDR or HNF4 $\alpha$ . For co-IP assay of VDR interaction with c-Src, anti-VDR was used to coimmunoprecipitate VDR and c-Src in the membrane protein extracts, and rabbit anti-c-Src, and antiphospho-Src (Y416/Y419) antibodies were used to detect c-Src and p-Y416/Y419-c-Src, respectively, in the immunoprecipitates.

### In vitro ERK1/2 assay

The p44/42 (ERK1/2) MAPK Assay kit (Cell Signaling Technology, Inc.) was used to study *in vitro* serine phosphorylation of VDR, RXR $\alpha$ , and HNF4 $\alpha$  by ERK1/2 according to the manufacturer's instruction. Briefly, 15  $\mu\text{l}$  of beads coated with antiphospho-ERK1/2 antibody were incubated with 300  $\mu\text{g}$  of total cell extracts to immobilize phospho-ERK1/2. After gentle rocking at 4 C overnight, the immobilized beads containing active p-ERK1/2 were pelleted at  $5000\times g$  for 30 sec, followed by washing with cold  $1\times$  cell lysis buffer twice and with  $1\times$  kinase buffer twice. The washed beads were suspended in 50  $\mu\text{l}$   $1\times$  kinase buffer supplemented with 200  $\mu\text{M}$  ATP and then incubated with *in vitro* synthesized VDR, RXR $\alpha$ , or HNF4 $\alpha$  using the transcription and translation (TNT) lysate system (Promega) for 30 min at 30 C. The kinase phosphorylation reaction was terminated by adding 25  $\mu\text{l}$   $3\times$  SDS sample buffer. VDR, RXR $\alpha$ , and HNF4 $\alpha$  were immunoprecipitated by their respective antibodies (Santa Cruz Biotechnology, Inc.) for another 6 h. Phosphorylation of the serine residues in VDR, RXR $\alpha$ , or HNF4 $\alpha$  was detected by mouse antiphosphoserine antibody (GE Healthcare Bio-Sciences Corp.). The purified ELK-1 included in the ERK1/2 assay kit was assayed as a positive control.

## Mammalian two-hybrid assays

The reporter plasmid p5xUAS-TK-Luc containing five copies of the upstream activating sequence (UAS) fused to the upstream of the thymidine kinase (TK) promoter and the luciferase reporter gene was used for mammalian two-hybrid assays as reported previously (14). Gal4-VDR was cotransfected with VP16 empty vector, pcDNA3.1, VP16-HNF4 $\alpha$ , VP16-NCoR-1, VP16-SMRT, VP16-SRC-1, RXR $\alpha$ , PGC-1 $\alpha$ , SRC-1, SMRT, or NCoR-1 as indicated, into human embryonic kidney (HEK)293 cells. Reporter activity was assayed as described above.

## ChIP assay

Primary human hepatocytes in T25 flasks were maintained in serum-free media overnight and then incubated with or without ERK1/2 inhibitor (U) for 1 h followed by treatment with vehicle (EtOH), 1 $\alpha$ ,25(OH) $_2$ -D $_3$  (50 nM), or LCA-acetate (10  $\mu$ M). ChIP assays were performed using ChIP assay kit (Millipore Corp.) following the manufacturer's protocol. Cells were cross-linked in 1% formaldehyde and sonicated. Protein-DNA complexes were precipitated using rabbit anti-VDR, rabbit anti-RXR $\alpha$ , rabbit anti-HNF4 $\alpha$ , goat anti-PGC-1 $\alpha$ , goat anti-NCoR-1, or rabbit anti-SMRT antibody (Santa Cruz Biotechnology, Inc.). Rabbit nonimmune IgG was added as a negative control. Q-PCR was used to quantify the CYP7A1 promoter region BARE-I+BARE-II, which was previously identified as a HNF4 $\alpha$ -binding site that also binds VDR/RXR $\alpha$  (14), according to a method described previously (45). TaqMan real-time PCR primer set (Applied Biosystems) for CYP7A1BARE-II promoter: forward primer, 5-GGTCTCT-GATTGCTTTGGAACC; reverse primer, 5-AAAAGTGGTAG-TAACTGGCCTTGAA; TaqMan probe: TTCTGATACCTGTG-GACTTA; intron 5 primer set (nucleotide 8127-8195), forward primer, 5-TTCTCTCTGGGAACCCTTCTCTC, reverse primer, 5-TCCTATCCTGCTTGAACGATTAGTT; TaqMan probe: CT-AGCTCTGCCTGACTAA.

For ChIP assay of VDRE binding to the human CYP24A1 promoter, Q-PCR was designed to detect a region containing two well-defined VDREs ( $_{-285}$ -AGTTCACCGGGTGTG $_{-299}$  and  $_{-164}$ -AGGTCAGCGAGGGCG $_{-178}$ ) (34). TaqMan real-time PCR primer set for CYP24A1 promoter: forward primer: -30, ATGGTCCCTGGGCATAGGA.

Reverse primer: +24, GCTGGCGCTGCGTTTC; MGB probe: CATGGAGAGGGACAGGA.

## Statistical analysis

All results were expressed as mean  $\pm$  SD. Q-PCR and reporter assay data were analyzed with Student's *t* test. *P* values of <0.05 were considered as statistically significant differences between treated and untreated control.

## Acknowledgments

Human primary hepatocytes were provided by the Liver Tissue and Cells Distribution System of National Institute of Diabetes and Digestive and Kidney Diseases, National Institutes of Health (#N01-DK-7-0004/HHSN267200700004C).

Address all correspondence and requests for reprints to: Dr. John Y. L. Chiang, Department of Integrative Medical Sciences, Northeastern Ohio University's Colleges of Medicine and Pharmacy, 4209 State Route 44, Rootstown, Ohio 44272. E-mail: jchiang@neoucom.edu.

This research was supported by National Institute of Health Grants DK44442 and DK58379 (to J.Y.L.C.), and DK92310 (to S.S.).

Disclosure Summary: The authors have confirmed the originality and disclosed no conflict of interest of this study.

## References

- Chiang JY 2009 Bile acids: regulation of synthesis. *J Lipid Res* 50:880–892
- Hylemon PB, Zhou H, Pandak WM, Ren S, Gil G, Dent P 2009 Bile acids as regulatory molecules. *J Lipid Res* 50:1509–1520
- Lefebvre P, Cariou B, Lien F, Kuipers F, Staels B 2009 Role of bile acids and bile acid receptors in metabolic regulation. *Physiol Rev* 89:147–191
- Thomas C, Pellicciari R, Pruzanski M, Auwerx J, Schoonjans K 2008 Targeting bile-acid signalling for metabolic diseases. *Nat Rev Drug Discov* 7:678–693
- Holt JA, Luo G, Billin AN, Bisi J, McNeill YY, Kozarsky KF, Donahee M, Wang DY, Mansfield TA, Kliewer SA, Goodwin B, Jones SA 2003 Definition of a novel growth factor-dependent signal cascade for the suppression of bile acid biosynthesis. *Genes Dev* 17:1581–1591
- Inagaki T, Choi M, Moschetta A, Peng L, Cummins CL, McDonald JG, Luo G, Jones SA, Goodwin B, Richardson JA, Gerard RD, Repa JJ, Mangelsdorf DJ, Kliewer SA 2005 Fibroblast growth factor 15 functions as an enterohepatic signal to regulate bile acid homeostasis. *Cell Metab* 2:217–225
- Makishima M, Lu TT, Xie W, Whitfield GK, Domoto H, Evans RM, Haussler MR, Mangelsdorf DJ 2002 Vitamin D receptor as an intestinal bile acid sensor. *Science* 296:1313–1316
- Staudinger JL, Goodwin B, Jones SA, Hawkins-Brown D, MacKenzie KI, LaTour A, Liu Y, Klaassen CD, Brown KK, Reinhard J, Willson TM, Koller BH, Kliewer SA 2001 The nuclear receptor PXR is a lithocholic acid sensor that protects against liver toxicity. *Proc Natl Acad Sci USA* 98:3369–3374
- Drocourt L, Ourlin JC, Pascussi JM, Maurel P, Vilarem MJ 2002 Expression of CYP3A4, CYP2B6, and CYP2C9 is regulated by the vitamin D receptor pathway in primary human hepatocytes. *J Biol Chem* 277:25125–25132
- Seo YK, Chung YT, Kim S, Echchgadda I, Song CS, Chatterjee B 2007 Xenobiotic- and vitamin D-responsive induction of the steroid/bile acid-sulfotransferase Sult2A1 in young and old mice: the role of a gene enhancer in the liver chromatin. *Gene* 386:218–223
- Norman AW 2006 Minireview: vitamin D receptor: new assignments for an already busy receptor. *Endocrinology* 147:5542–5548
- Bookout AL, Jeong Y, Downes M, Yu RT, Evans RM, Mangelsdorf DJ 2006 Anatomical profiling of nuclear receptor expression reveals a hierarchical transcriptional network. *Cell* 126:789–799
- Gascon-Barré M, Demers C, Mirshahi A, Néron S, Zalzal S, Nanci A 2003 The normal liver harbors the vitamin D nuclear receptor in non-parenchymal and biliary epithelial cells. *Hepatology* 37:1034–1042
- Han S, Chiang JY 2009 Mechanism of vitamin D receptor inhibition of cholesterol 7 $\alpha$ -hydroxylase gene transcription in human hepatocytes. *Drug Metab Dispos* 37:469–478
- Norman AW, Mizwicki MT, Norman DP 2004 Steroid-hormone rapid actions, membrane receptors and a conformational ensemble model. *Nat Rev Drug Discov* 3:27–41
- Huhtakangas JA, Olivera CJ, Bishop JE, Zanello LP, Norman AW 2004 The vitamin D receptor is present in caveolae-enriched plasma membranes and binds 1 $\alpha$ ,25(OH) $_2$ -vitamin D $_3$  *in vivo* and *in vitro*. *Mol Endocrinol* 18:2660–2671
- Boland R, De Boland AR, Buitrago C, Morelli S, Santillán G, Vazquez G, Capiati D, Baldi C 2002 Non-genomic stimulation of tyrosine phosphorylation cascades by 1,25(OH) $_2$ D $_3$  by VDR-de-

- pendent and -independent mechanisms in muscle cells. *Steroids* 67:477–482
18. Buitrago C, Boland R, de Boland AR 2001 The tyrosine kinase c-Src is required for  $1,25(\text{OH})_2$ -vitamin  $\text{D}_3$  signalling to the nucleus in muscle cells. *Biochim Biophys Acta* 1541:179–187
  19. Boland R, Buitrago C, De Boland AR 2005 Modulation of tyrosine phosphorylation signalling pathways by  $1\alpha,25(\text{OH})_2$ -vitamin  $\text{D}_3$ . *Trends Endocrinol Metab* 16:280–287
  20. Adachi R, Honma Y, Masuno H, Kawana K, Shimomura I, Yamada S, Makishima M 2005 Selective activation of vitamin D receptor by lithocholic acid acetate, a bile acid derivative. *J Lipid Res* 46:46–57
  21. Buitrago C, Vazquez G, De Boland AR, Boland RL 2000 Activation of Src kinase in skeletal muscle cells by  $1, 1,25$ -(OH) $_2$ -vitamin  $\text{D}_3$  correlates with tyrosine phosphorylation of the vitamin D receptor (VDR) and VDR-Src interaction. *J Cell Biochem* 79:274–281
  22. Chappel J, Ross FP, Abu-Amer Y, Shaw A, Teitelbaum SL 1997  $1,25$ -Dihydroxyvitamin  $\text{D}_3$  regulates pp60c-src activity and expression of a pp60c-src activating phosphatase. *J Cell Biochem* 67:432–438
  23. Lechner D, Kállay E, Cross HS 2007  $1\alpha,25$ -Dihydroxyvitamin  $\text{D}_3$  downregulates CYP27B1 and induces CYP24A1 in colon cells. *Mol Cell Endocrinol* 263:55–64
  24. Chiang JY 2009 Hepatocyte nuclear factor  $4\alpha$  regulation of bile acid and drug metabolism. *Expert Opin Drug Metab Toxicol* 5:137–147
  25. Mizwicki MT, Norman AW 2009 The vitamin D sterol-vitamin D receptor ensemble model offers unique insights into both genomic and rapid-response signaling. *Sci Signal* 2:re4
  26. Bjorge JD, Jakymiw A, Fujita DJ 2000 Selected glimpses into the activation and function of Src kinase. *Oncogene* 19:5620–5635
  27. Ronda AC, Buitrago C, Colicheo A, de Boland AR, Roldán E, Boland R 2007 Activation of MAPKs by  $1\alpha,25(\text{OH})_2$ -vitamin  $\text{D}_3$  and  $17\beta$ -estradiol in skeletal muscle cells leads to phosphorylation of Elk-1 and CREB transcription factors. *J Steroid Biochem Mol Biol* 103:462–466
  28. Wu W, Zhang X, Zanello LP 2007  $1\alpha,25$ -Dihydroxyvitamin  $\text{D}_3$  antiproliferative actions involve vitamin D receptor-mediated activation of MAPK pathways and AP-1/p21(waf1) upregulation in human osteosarcoma. *Cancer Lett* 254:75–86
  29. Toell A, Polly P, Carlberg C 2000 All natural DR3-type vitamin D response elements show a similar functionality in vitro. *Biochem J* 352:301–309
  30. Väisänen S, Dunlop TW, Sinkkonen L, Frank C, Carlberg C 2005 Spatio-temporal activation of chromatin on the human CYP24 gene promoter in the presence of  $1\alpha,25$ -dihydroxyvitamin  $\text{D}_3$ . *J Mol Biol* 350:65–77
  31. Polly P, Herdick M, Moehren U, Baniahmad A, Heinzel T, Carlberg C 2000 VDR-Alien: a novel, DNA-selective vitamin  $\text{D}_3$  receptor-corepressor partnership. *FASEB J* 14:1455–1463
  32. Hsieh JC, Sisk JM, Jurutka PW, Haussler CA, Slater SA, Haussler MR, Thompson CC 2003 Physical and functional interaction between the vitamin D receptor and hairless corepressor, two proteins required for hair cycling. *J Biol Chem* 278:38665–38674
  33. Kim JY, Son YL, Lee YC 2009 Involvement of SMRT corepressor in transcriptional repression by the vitamin D receptor. *Mol Endocrinol* 23:251–264
  34. Sánchez-Martínez R, Zambrano A, Castillo AI, Aranda A 2008 Vitamin D-dependent recruitment of corepressors to vitamin D/retinoid X receptor heterodimers. *Mol Cell Biol* 28:3817–3829
  35. Kim MS, Fujiki R, Murayama A, Kitagawa H, Yamaoka K, Yamamoto Y, Mihara M, Takeyama K, Kato S 2007  $1\alpha,25(\text{OH})_2\text{D}_3$ -induced transrepression by vitamin D receptor through E-box-type elements in the human parathyroid hormone gene promoter. *Mol Endocrinol* 21:334–342
  36. Ewing AK, Attner M, Chakravarti D 2007 Novel regulatory role for human Acl1 in transcriptional repression of vitamin  $\text{D}_3$  receptor-regulated genes. *Mol Endocrinol* 21:1791–1806
  37. Maruyama T, Miyamoto Y, Nakamura T, Tamai Y, Okada H, Sugiyama E, Nakamura T, Itadani H, Tanaka K 2002 Identification of membrane-type receptor for bile acids (M-BAR). *Biochem Biophys Res Commun* 298:714–719
  38. Kawamata Y, Fujii R, Hosoya M, Harada M, Yoshida H, Miwa M, Fukusumi S, Habata Y, Itoh T, Shintani Y, Hinuma S, Fujisawa Y, Fujino M 2003 A G protein-coupled receptor responsive to bile acids. *J Biol Chem* 278:9435–9440
  39. Watanabe M, Houten SM, Matakai C, Christoffolete MA, Kim BW, Sato H, Messaddeq N, Harney JW, Ezaki O, Kodama T, Schoonjans K, Bianco AC, Auwerx J 2006 Bile acids induce energy expenditure by promoting intracellular thyroid hormone activation. *Nature* 439:484–489
  40. Ishizawa M, Matsunawa M, Adachi R, Uno S, Ikeda K, Masuno H, Shimizu M, Iwasaki K, Yamada S, Makishima M 2008 Lithocholic acid derivatives act as selective vitamin D receptor modulators without inducing hypercalcemia. *J Lipid Res* 49:763–772
  41. Crestani M, Stroup D, Chiang JY 1995 Hormonal regulation of the cholesterol  $7\alpha$ -hydroxylase gene (CYP7). *J Lipid Res* 36:2419–2432
  42. Wang DP, Stroup D, Marrapodi M, Crestani M, Galli G, Chiang JY 1996 Transcriptional regulation of the human cholesterol  $7\alpha$ -hydroxylase gene (CYP7A) in HepG2 cells. *J Lipid Res* 37:1831–1841
  43. Chen W, Chiang JY 2003 Regulation of human sterol  $27$ -hydroxylase gene (CYP27A1) by bile acids and hepatocyte nuclear factor  $4\alpha$  (HNF4 $\alpha$ ). *Gene* 313:71–82
  44. Li T, Chiang JY 2005 Mechanism of rifampicin and pregnane X receptor inhibition of human cholesterol  $7\alpha$ -hydroxylase gene transcription. *Am J Physiol Gastrointest Liver Physiol* 288:G74–G84
  45. Li T, Chiang JY 2007 A Novel Role of Transforming Growth Factor  $\beta$ 1 in transcriptional repression of human cholesterol  $7\alpha$ -hydroxylase gene. *Gastroenterology* 133:1660–1669
